# Supplementary material for: Selective Deoxygenation of Sludge Palm Oil into Diesel Range Fuel over Mn-Mo Supported on Activated Carbon Catalyst
Source: MDPI journal article supplement (doi:10.3390/catal12050566), 2022-05-20
Supplement: s1 [file s1]

# Selective Deoxygenation of Sludge Palm Oil into Diesel Range Fuel over Mn-Mo Supported on Activated Carbon Catalyst

Abdulkareem Ghassan Alsultan <sup>1,\*</sup>, Nurul Asikin-Mijan <sup>2,\*</sup>, Laith K. Obeas <sup>3</sup>, Aminul Islam <sup>4</sup>, Nasar Mansir <sup>5</sup>, Siow Hwa Teo <sup>6</sup>, Siti Zulaika Razali <sup>7</sup>, Maadh F. Nassar <sup>8</sup>, Surahim Mohamad <sup>8</sup> and Yun Hin Taufiq-Yap <sup>1,9,\*</sup>

<sup>1</sup> Chemistry Department Faculty of Science and Natural Resources, Universiti Malaysia Sabah, Kota Kinabalu 88400, Sabah, Malaysia

<sup>2</sup> Department Of Chemical Sciences, Faculty of Science and Technology, Universiti Kebangsaan Malaysia Bangi, Bandar Baru Bangi 43600, Selangor Darul Ehsan, Malaysia

<sup>3</sup> Department Chemical Engineering, Technical Institute of Babylon, Al-Furat Al-Awsat Technical University (ATU)51001, Iraq; laith1978@atu.edu.iq

<sup>4</sup> Department Of Petroleum and Mining Engineering (PME), Jashore University of Science and Technology, Jashore 7408, Bangladesh; aminul03211@yahoo.com

<sup>5</sup> Department Of Chemistry, Faculty of Science, Federal University Dutse, Dutse 7156, Jigawa, Nigeria; nmansir09@yahoo.com

<sup>6</sup> Industrial Chemistry Program, Faculty Science and Natural Resources, Universiti Malaysia Sabah, Kota Kinabalu 88400, Sabah, Malaysia; tony@ums.edu.my

<sup>7</sup> Nanomaterials Processing and Technology Laboratory, Institute of Nanoscience and Nanotechnology, Universiti Putra Malaysia Serdang, Seri Kembangan 43400, Selangor, Malaysia; zulaika@upm.edu.my

<sup>8</sup> Department Of Chemistry, Faculty of Science, Universiti Putra Malaysia Serdang, Seri Kembangan 43400, Selangor, Malaysia; zulaika@upm.edu.my (S.Z.R.); nassarmaadh@gmail.com (M.F.N.); surahim88@gmail.com (S.M.)

<sup>9</sup> Vice Chancellor Office, Universiti Malaysia Sabah, Kota Kinabalu 88400, Sabah, Malaysia

\* Correspondence: kreem.alsultan@yahoo.com (A.G.A.); ckin\_mijan@yahoo.com (N.A.-M.); taufiq@upm.edu.my (Y.H.T.-Y.); Tel.: +60-182534058 (A.G.A.); +60-176545305 (N.A.-M.); +60-3-89466809 (Y.H.T.-Y.); Fax: +60-3-89466758 (Y.H.T.-Y.).

## List off Supplementary data

- 1- The biproduct gas analysis using Thermal Conductivity Detector-gas chromatography (GC-TCD) at the optimum condition using Mn (0.5%)- Mo (0.5%)/AC
- 2- Catalyst evaluation using different feedstocks (Sludge palm oil and fresh palm oil).
- 3- Deoxygenation reaction mechanism of unsaturated and saturated free fatty acids.

**Table S1.** The biproduct gas analysis using Thermal Conductivity Detector-gas chromatography (GC-TCD) at the optimum condition using Mn<sub>(0.5%)</sub>- Mo<sub>(0.5%)</sub>/AC.

| Name            | Ret<br>Time(min) | Area (%) |        |
|-----------------|------------------|----------|--------|
|                 |                  | Run #1   | Run #5 |
| CO <sub>2</sub> | 2.947            | 31.98    | 29.93  |
| H <sub>2</sub>  | 6.341            | 0.00     | 0.00   |
| CH <sub>4</sub> | 10.689           | 1.82     | 1.71   |
| CO              | 14.873           | 66.2     | 68.36  |

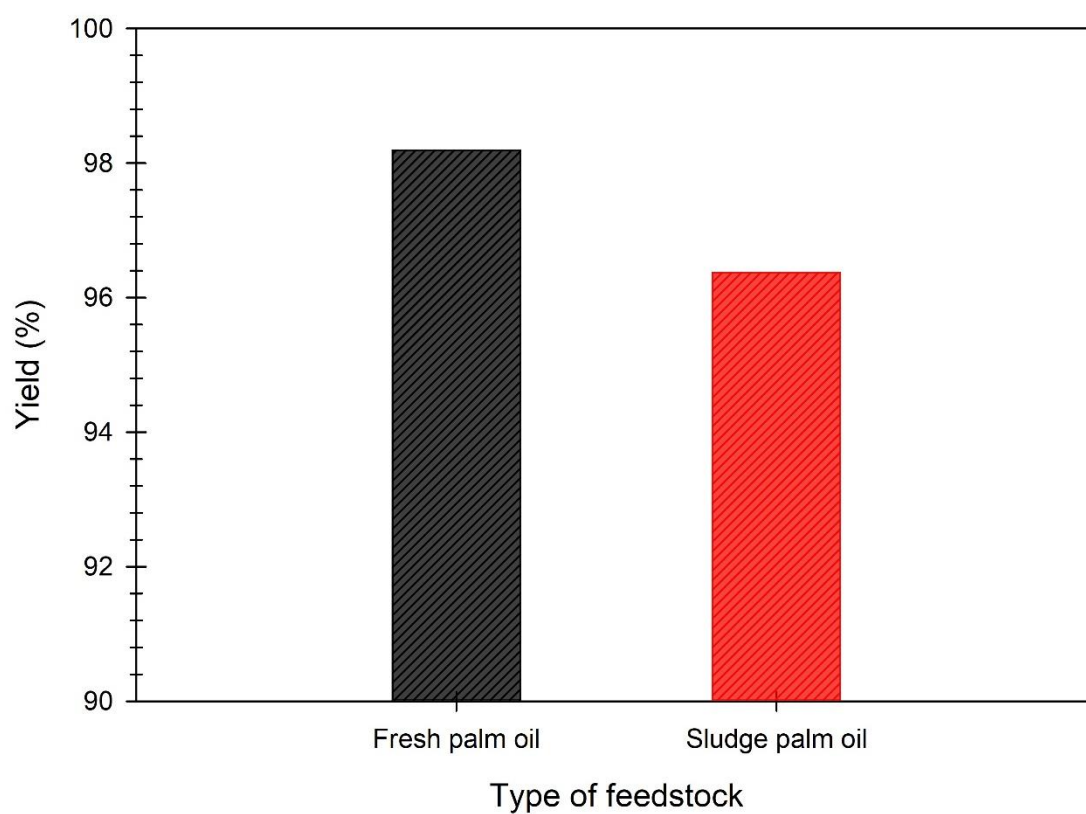

**Figure S1.** Catalyst evaluation using different feedstocks: (Sludge palm oil and fresh palm oil).

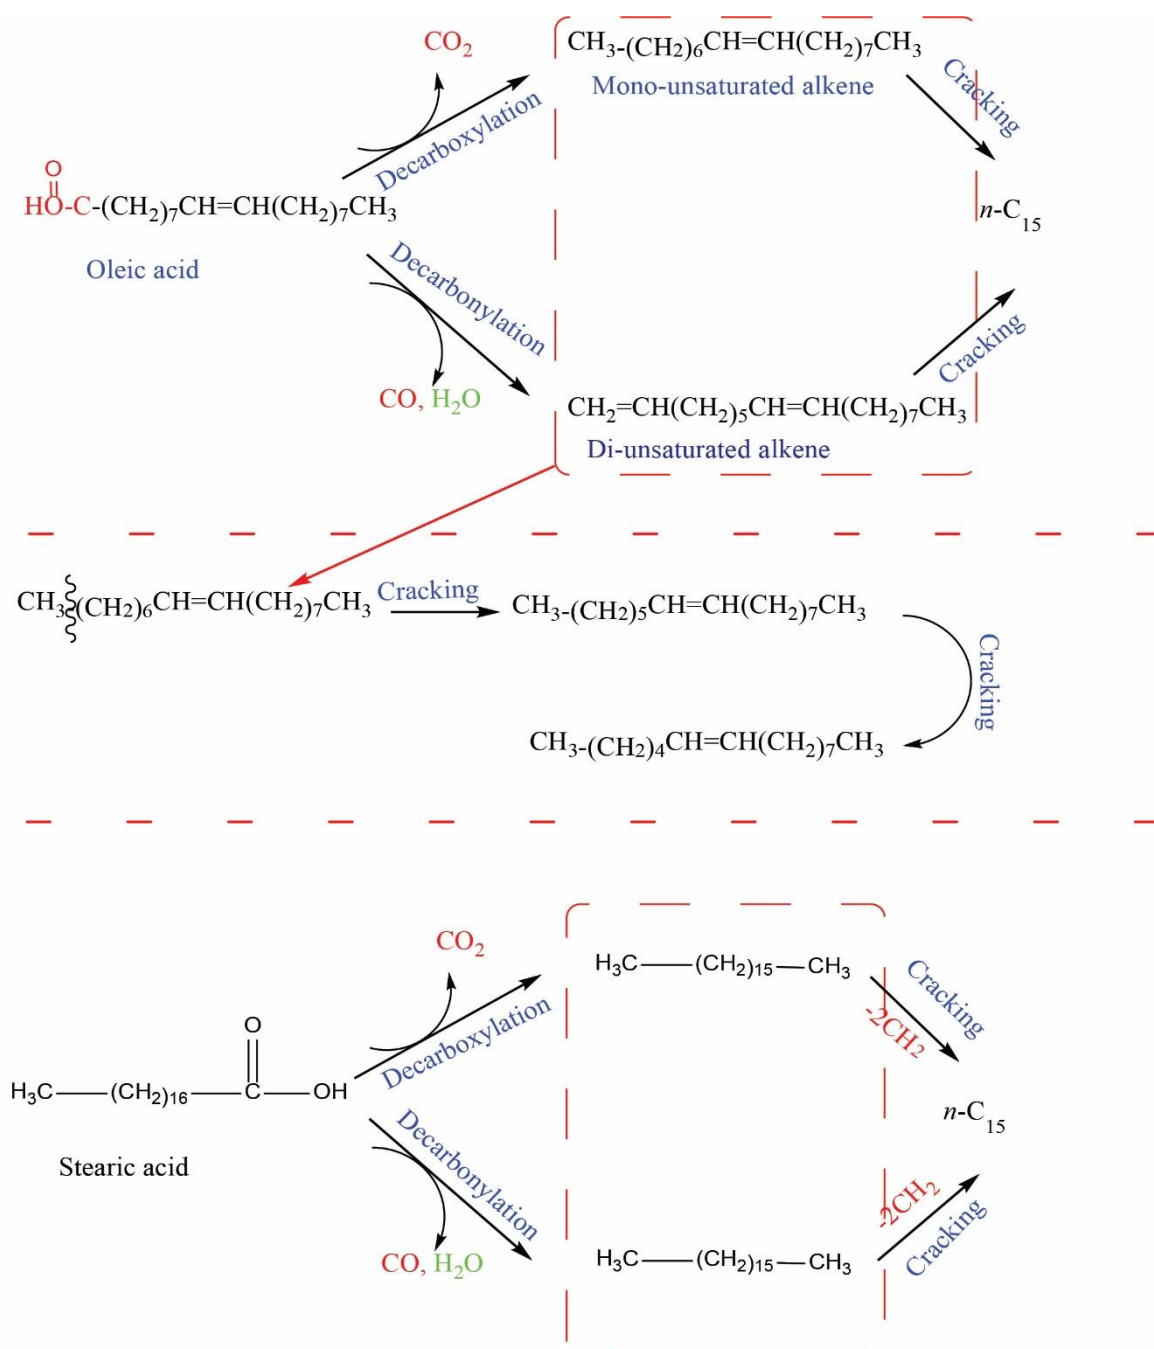

**Figure S2.** Deoxygenation reaction mechanism of unsaturated and saturated free fatty acids.
